# Supplementary material for: An ion-gating synaptic memristor based on tri-layer HfOx composition regulation
Source: Royal Society of Chemistry journal article supplement (doi:10.1039/d4tc04564e), 2025-01-01
Supplement: d4tc04564e1.pdf [file d4tc04564e1.pdf]

## **Ion-gating Synaptic Memristor Based On Tri-layer HfO<sub>x</sub> Composition Regulation**

Lanqing Zou<sup>1</sup>, Junming Zhang<sup>1</sup>, Yunhui Yi<sup>1</sup>, Jiawang Ren<sup>1</sup>, Huajun Sun<sup>1,2\*</sup>, Chuqian Zhu<sup>1</sup>, Jiyang Xu<sup>1</sup>, Sheng Hu<sup>1,3</sup>, Lei Ye<sup>1,2</sup>, Weiming Cheng<sup>1,2</sup>, Qiang He<sup>1,2</sup>, Xiangshui Miao<sup>1,2</sup>

### AFFILIATIONS

<sup>1</sup>School of Integrated Circuits, Hubei Key Laboratory of Advanced Memories, Hubei Engineering Research Center on Microelectronics, Huazhong University of Science and Technology, Wuhan 430074, China

<sup>2</sup>Hubei Yangtze Memory Laboratories, Wuhan 430205, China

<sup>3</sup> Wuhan Xinxin Semiconductor Manufacturing Corporation, Wuhan, 430205, China

\*Authors to whom correspondence should be addressed: shj@hust.edu.cn;

## S1 Device Forming voltage comparison diagram

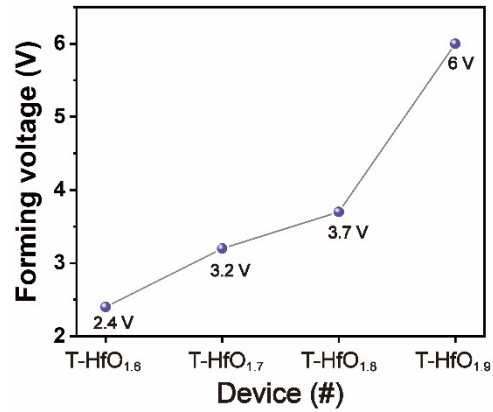

**Fig.S1.** Comparison diagram of Forming voltage values of four devices

As shown in [Fig.S1](#), the Forming voltage of T-HfO<sub>1.6</sub> is 2.4 V, that of T-HfO<sub>1.7</sub> is 3.2 V, that of T-HfO<sub>1.8</sub> is 3.7 V, and that of T-HfO<sub>1.9</sub> is 6 V. It can be seen that the Forming voltage increases with the increase of x value.

**S2 Comparison diagram of low resistance consistency of T-HfO<sub>1.7</sub> with other memristor devices**

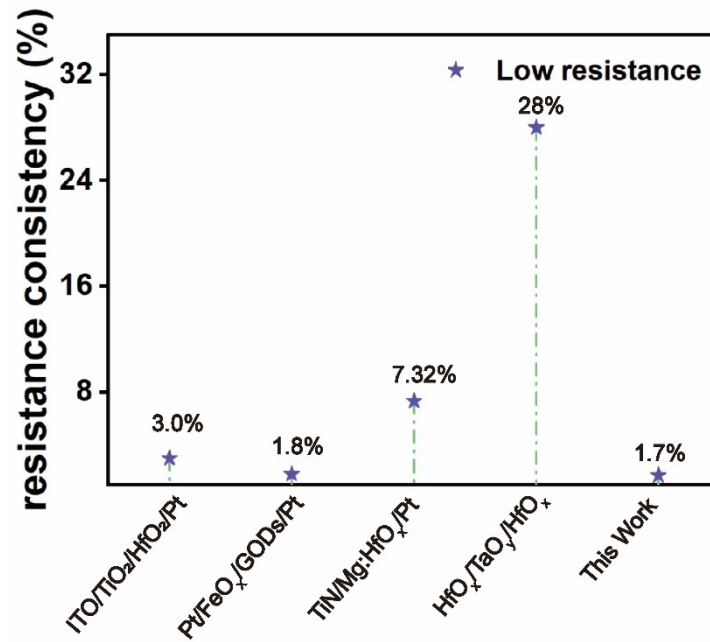

**Fig.S2.** Low resistance consistency comparison diagram

As shown in [Fig. S2](#), comparing T-HfO<sub>1.7</sub> with other memristor devices<sup>1-4</sup> with improved consistency, T-HfO<sub>1.7</sub> has good low-resistance consistency because we control the CFs breakage in the HfO<sub>2</sub> middle layer.

### S3 Pavlov's dog experiment of T-HfO<sub>1.7</sub> device

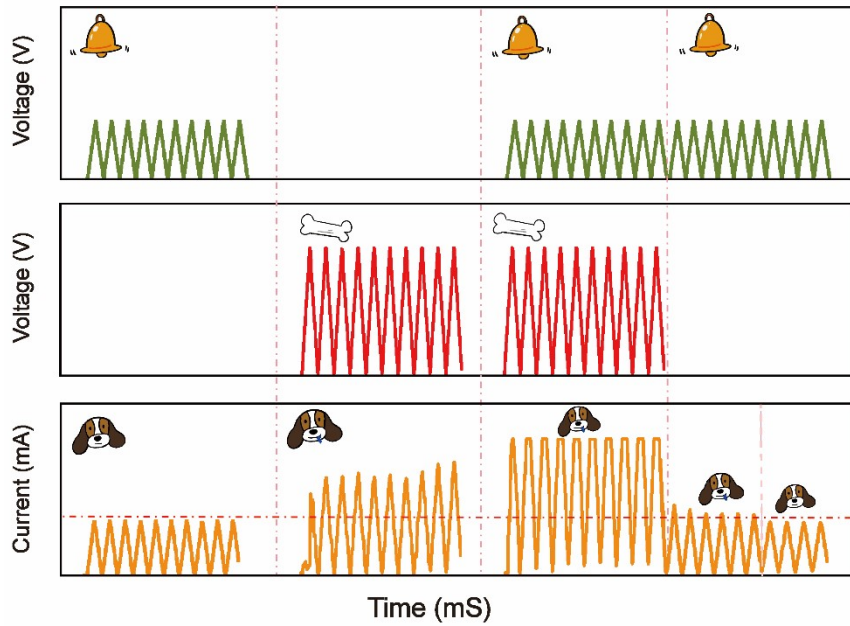

**Fig.S3. Device implementation of Pavlov's dog process diagram**

As shown in Fig. S3, first, a single bell ringing does not cause the dog to salivate, the T-HfO<sub>1.7</sub> is placed in a low conduction state, and the pulse stimulation with an amplitude of 1V is used to simulate the bell ringing, and the T-HfO<sub>1.7</sub> is still in a low conduction state. The food alone causes the dog to salivate, and a pulse stimulus with a amplitude of 3V is used to simulate the food, which can be seen to put the T-HfO<sub>1.7</sub> in a high conduction state; Further, in the training process, the dog was fed when the bell rang, establishing a connection between the food and the bell, after this training, when the food was removed, the bell sounded, the dog would also secrete saliva, and voltage was applied to the T-HfO<sub>1.7</sub> at the same time. It can be observed that when the 3V pulse stimulation was removed, the device was still in a high conductivity state, but with the increase of time, after the food was removed, the T-HfO<sub>1.7</sub> was still in a high conductivity state. The association between food and ringing gradually weakens and disappears.

### S3 Estimation of non-ideal factors

The mathematical fitting of T-HfO<sub>1.7</sub>'s simulated weight update behavior is as follows<sup>5</sup> :

$$G_{LTP} = B \left( 1 - e^{-\frac{N}{A}} \right) + G_{min} \#(1.1)$$

$$G_{LTD} = G_{max} - B \left( 1 - e^{-\frac{N - N_{max}}{A}} \right) \#(1.2)$$

$$B = (G_{max} - G_{min}) / \left( 1 - e^{-\frac{N_{max}}{A}} \right) \#(1.3)$$

Where  $G_{LTP}$  and  $G_{LTD}$  are functions of the LTP/LTD curve varying with the number of pulses  $N$ ,  $G_{max}$  and  $N_{max}$  is the saturation conductance value and the maximum number of pulses allowed to be applied, respectively, and  $A$  and  $B$  are the parameters to be fitted.

Further, the nonlinearity ( $\alpha$ ) can be fitted:

$$\alpha = \frac{1.726}{A + 0.162} \#(1.4)$$

**Table S1. CV of LRS, HRS and Nonlinear parameter of LTD/LTP between synaptic memristor devices**

| Device                                                          | CV of LRS/HRS | Nonlinear parameter of LTP/LTD | Ref.      |
|-----------------------------------------------------------------|---------------|--------------------------------|-----------|
| Au/HfO <sub>x</sub> /TaO <sub>y</sub> /HfO <sub>x</sub> /Ti/TiN | 0.28/0.57     | 5.3/11.9                       | 4         |
| Pt/HfO <sub>2</sub> NRs/TiN                                     | 0.219/0.312   |                                | 6         |
| Pt/TiO <sub>x</sub> /ZnO/SiO <sub>2</sub> /TaN                  | 0.155/0.326   | 8/0.52                         | 7         |
| Al/A-C-B-D TiO <sub>x</sub> /Al                                 |               | 2.4/4.6                        | 8         |
| n-Si/HfO <sub>2</sub> /WO <sub>3</sub> /Ag                      |               | 2.49/5.54                      | 9         |
| T-HfO <sub>1.7</sub>                                            | 0.017/0.126   | 1.55/4.55                      | This work |

### References

1. L.-H. Li, K.-H. Xue, L.-Q. Zou, J.-H. Yuan, H. Sun and X. Miao, *Appl. Phys. Lett.*, 2021, 119.
2. R. Zhang, H. Huang, Q. Xia, C. Ye, X. Wei, J. Wang, L. Zhang and L. Q. Zhu, *Adv. Electron. Mater.*, 2019, 5.
3. C. Wang, W. He, Y. Tong, Y. Zhang, K. Huang, L. Song, S. Zhong, R. Ganeshkumar and R. Zhao, *Small*, 2017, 13.
4. D. Sakellariopoulos, P. Bousoulas, G. Nikas, C. Arvanitis, E. Bagakis and D. Tsoukalas, *Microelectron. Eng.*, 2020, 229.
5. Y. Fu, B. Dong, W. C. Su, C. Y. Lin, K. J. Zhou, T. C. Chang, F. Zhuge, Y. Li, Y. He, B. Gao and X. S. Miao, *Nanoscale*, 2020, 12, 22970-22977.
6. J. U. Kwon, Y. G. Song, J. E. Kim, S. Y. Chun, G. H. Kim, G. Noh, J. Y. Kwak, S. Hur, C.-Y. Kang, D. S. Jeong, S. J. Oh and J. H. Yoon, *ACS Appl. Mater. Interfaces*, 2022, 14, 44550-44560.
7. M. Ismail, M. Rasheed, C. Mahata, M. Kang and S. Kim, *J. Alloys Compd.*, 2023, 960, 170846.
8. M. Kim, K. Yoo, S. P. Jeon, S. K. Park and Y. H. Kim, *Micromachines (Basel)*, 2020, 11.
9. Q. Liu, S. Gao, Y. Li, W. Yue, C. Zhang, H. Kan and G. Shen, *Adv. Mater. Technol.*, 2023, 8, 2201143.
